# Supplementary material
Source: Springer Nature journal article supplement (https://www.springermedizin.de/resource/supplementary/12943_2010_925_MOESM7_ESM.pdf/9552008)

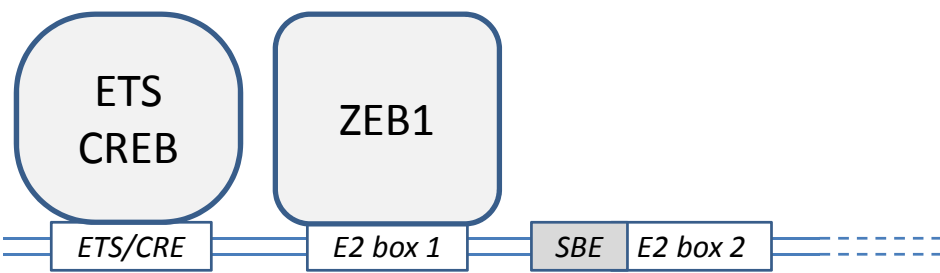

CAR expression:

+++                      -                      n/a

Net:  
++

TGF-β

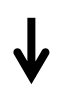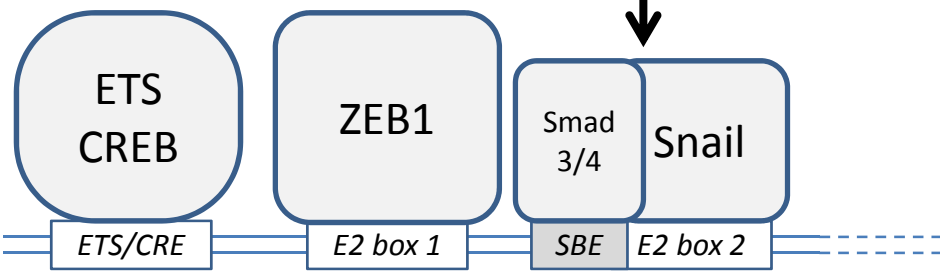

CAR expression:

+++                      -                      -

Net:  
+

TGF-β

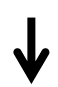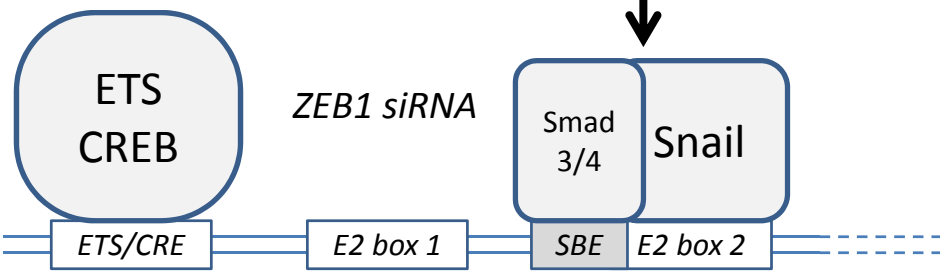

CAR expression:

+++                      n/a                      -

Net:  
++

Supplement: MOESM7 [file 9552008]
